# Supplementary material
Source: PubMed Central journal article supplement (PMC9123931)
Supplement: zuac012_supplementary_data.pdf [file zuac012_supplementary_data.pdf]

## **SUPPLEMENTAL MATERIAL**

### **A Pragmatic Lab-based Tool for Risk Assessment in Cardiac Critical Care: Data from the Critical Care Cardiology Trials Network (CCCTN) Registry**

Siddharth M. Patel, MD<sup>1</sup>; Jacob C. Jentzer, MD<sup>2</sup>; Carlos L. Alviar, MD<sup>3</sup>; Vivian M. Baird-Zars, MPH<sup>1</sup>; Gregory W. Barsness, MD<sup>2</sup>; David D. Berg, MD, MPH<sup>1</sup>; Erin A. Bohula, MD, DPhil<sup>1</sup>; Lori B. Daniels, MD, MAS<sup>4</sup>; Andrew P. DeFilippis, MD<sup>5</sup>; Ellen C. Keeley, MD, MS<sup>6</sup>; Michael C. Kontos, MD<sup>7</sup>; Patrick R. Lawler, MD, MPH<sup>8</sup>; P. Elliott Miller, MD<sup>9</sup>; Jeong-Gun Park, PhD<sup>1</sup>; Robert O. Roswell, MD<sup>10</sup>; Michael A. Solomon, MD, MBA<sup>11</sup>; Sean van Diepen, MD, MSc<sup>12</sup>; Jason N. Katz, MD, MHS<sup>13</sup>; David A. Morrow, MD, MPH<sup>1</sup>; on behalf of the CCCTN Investigators

<sup>1</sup> Levine Cardiac Intensive Care Unit, TIMI Study Group, Cardiovascular Division, Department of Medicine, Brigham and Women's Hospital and Harvard Medical School, Boston, MA

<sup>2</sup> Department of Cardiovascular Medicine, Mayo Clinic, Rochester, MN

<sup>3</sup> Division of Cardiology, Department of Medicine, NYU Langone Medical Center, New York, NY

<sup>4</sup> Sulpizio Cardiovascular Center, University of California San Diego, La Jolla, CA

<sup>5</sup> Division of Cardiology, Department of Medicine, Vanderbilt University, Nashville, TN

<sup>6</sup> Division of Cardiology, Department of Medicine, University of Florida, Gainesville, FL

<sup>7</sup> Division of Cardiology, Department of Internal Medicine, Virginia Commonwealth University, Richmond, VA

<sup>8</sup> Peter Munk Cardiac Centre at Toronto General Hospital, Division of Cardiology and Interdepartmental Division of Critical Care Medicine, University of Toronto, Toronto, Ontario, Canada

<sup>9</sup> Section of Cardiovascular Medicine, Department of Internal Medicine, Yale University School of Medicine, New Haven, CT

<sup>10</sup> Lenox Hospital, Northwell Health, New York, NY

<sup>11</sup> Critical Care Medicine Department, National Institutes of Health Clinical Center and Cardiovascular Branch, National Heart, Lung, and Blood Institute of the National Institutes of Health, Bethesda, MD

<sup>12</sup> Division of Cardiology, Department of Critical Care, Department of Medicine, University of Alberta, Edmonton, AB, Canada

<sup>13</sup> Division of Cardiology, Department of Medicine, Duke University, Durham, NC

## TABLE OF CONTENTS

|                                                 |           |
|-------------------------------------------------|-----------|
| <b>CCCTN Leadership and Investigators .....</b> | <b>3</b>  |
| <b>Supplemental Table 1 .....</b>               | <b>5</b>  |
| <b>Supplemental Table 2 .....</b>               | <b>6</b>  |
| <b>Supplemental Table 3 .....</b>               | <b>8</b>  |
| <b>Supplemental Table 4 .....</b>               | <b>9</b>  |
| <b>Supplemental Figure 1 .....</b>              | <b>10</b> |
| <b>Supplemental Figure 2 .....</b>              | <b>11</b> |
| <b>Supplemental Figure 3 .....</b>              | <b>12</b> |
| <b>Supplemental Figure 4 .....</b>              | <b>13</b> |
| <b>Supplemental Figure 5 .....</b>              | <b>14</b> |

## **CCCTN LEADERSHIP AND INVESTIGATORS**

### **EXECUTIVE COMMITTEE**

David A. Morrow, MD MPH, Jason N. Katz, MD MHS, Sean van Diepen, MD MSc.

### **STEERING COMMITTEE (CURRENT)**

Carlos L. Alviar, MD, Christopher F. Barnett, MD, Sunit-Preet Chaudhry, MD, Lori B. Daniels, MD, Michael C. Kontos, MD, Shashank S. Sinha, MD

### **CCCTN DATA COORDINATING CENTER (TIMI STUDY GROUP)**

Marc S. Sabatine, MD MPH (TIMI Study Group Chairman), David A. Morrow, MD MPH (TIMI Principal Investigator), Erin A Bohula, MD DPhil (Co-Investigator), David D. Berg, MD (Co-Investigator), Vivian Baird-Zars, MPH (Project Manager/Data Manager), Sabina A. Murphy, MPH (Director of Statistics), Cardiovascular Division, Department of Medicine, Brigham and Women's Hospital, Boston, MA.

### **COLLABORATING CENTERS**

**Brigham and Women's Hospital**, Boston, MA: E Bohula (PI), D Morrow (Co-Investigator), K Butler (Research Coordinator).

**Cleveland Clinic Foundation**, Cleveland, OH: V Menon (PI), P Cremer (Investigator), O Abou Hassan, D. Hughes, R. Reyaldeen (Sub-Is), K Rutkowski (Nurse Coordinator).

**Cooper University Hospital**, Camden, NJ: S Hollenberg (PI), A Bakhshi, E Caruso, J Cruz, D Ricketti, J Weinstock (Sub-Is).

**Duke University**, Durham, NC: C Granger (PI), K Newby (Co-PI), K Brown, A Carnicelli, E Echols, R Harrison, J Katz, R Keane, D Loriaux (Sub-Is).

**INOVA Fairfax Hospital / INOVA Heart and Vascular Institute**, Falls Church, VA: S Sinha (PI), L Genovese (Sub-I), A Dewanjee, A Raja (Research Coordinators).

**Jewish General Hospital / McGill**, Montreal, Quebec, Canada: M Goldfarb (PI), C Robert (Study Coordinator).

**Johns Hopkins Hospital**, Baltimore, MD: S Zakaria (PI), T Metkus (Past PI), S Schulman (Co-I).

**Lehigh Valley Health Network**, Allentown, PA: J Burke (PI), T Maitz, L Racharla, S Vadhar (Sub-Is), K Cornell (Research Coordinator).

**Mayo Clinic**, Rochester, MN: G Barsness (PI), J Gladden, J Jentzer, N Singam (Sub-Is).

**MedStar Washington Hospital Center**, Washington, DC: A Papolos (PI), A Brown, L Carter, B Kenigsberg K Miltner (Sub-Is).

**National Institutes of Health**, Bethesda, MD: M Solomon (PI), N Rassekh, K Thompson (Sub-Is).

**New York University Langone Health**, New York, NY: N Keller (PI), C Alviar (Co-Investigator), D Petit Del, K Selig (Research Coordinators).

**Northwell Health, Lenox Hill**, New York, NY: R Roswell (PI), R Bar-Cohen (Sub-I), K Coleman (Research Coordinator).

**Northwell Health, North Shore**, New York, NY: E Grayver (PI), M Pierce (Co-PI), G Robinson (Sub-I), K Coleman (Research Coordinator).

**Rush University Medical Center**, Chicago, IL: J Snell (PI) N Jahan, S Majid (Research Coordinators).

**Stanford Hospital & Clinics**, Stanford, CA: J Teuteberg (PI), D Gerber (Co-PI), P Sanchez (Sub-I).

**St. Vincent Indianapolis/St. Vincent Heart Center of Indiana**, Indianapolis, IN: SP Chaudhry (PI), A Patel (Sub-I), B Wendling (Research Coordinator).

**Toronto General Hospital, University of Toronto**, Toronto, ON Canada: P Lawler (PI)

**University of Alberta**, Edmonton, Alberta, Canada: S van Diepen (PI), W Tymchak (Co-PI), N Hogg (Research Coordinator).

**University of Florida**, Gainesville, FL: E Keeley (PI), G Bhattal, D Leach (Sub-Is), S Long, J Bostick, A Osman (Research Coordinators).

**University of California San Diego**, La Jolla, CA: L Daniels (PI), N Phreaner (Sub-I), M Correa, E Kormuskins, A Mody, A Rehman, R Sedighi, D Smith, A Toomu, S Toomu, I Tran (Research Coordinators).

**University of Louisville**, Louisville, KY: S. Ghafghazi (PI), P Katrapati, K Kassem, S Zhang (Research fellows), S Vincent (Study nurse).

**University of North Carolina**, Chapel Hill, NC: J Katz (Past PI), C Dangerfield, R Orgel (Sub-Is), Z Ozen, E Prosser (Investigators), T Wade (Research Coordinator).

**University of Utah Health**, Salt Lake City, UT: K Shah (PI), J Almajed, J Fang, T Hanff (Sub-Is), J Hong (Research Coordinator).

**Vancouver General Hospital**, Vancouver, British Columbia, Canada: C Fordyce (PI), G Wong (Co-PI), J Chow, A Noronha (Research Coordinators).

**Virginia Commonwealth University**, Richmond, VA: M Kontos (PI), S Dow, C Vo (Sub-Is), D Spillman (Research Coordinator).

**Yale University**, New Haven, CT: E Miller (PI), K Love, M Phommalin, A Thomas (Sub-Is).

**Table S1:** In-Hospital Mortality by Baseline Lab Indicators in the Derivation Cohort

| Lab Indicator                        | Available % (n) | Median (25 <sup>th</sup> -75 <sup>th</sup> percentiles) | Univariable Odds Ratio per 1-SD (95% CI) | p-value | Multivariable Odds Ratio per 1-SD (95% CI) | β-coefficient per 1-SD (SE) | p-value | Wald-type Chi-square |
|--------------------------------------|-----------------|---------------------------------------------------------|------------------------------------------|---------|--------------------------------------------|-----------------------------|---------|----------------------|
| pH                                   | 49.9 (2171)     | 7.40 (7.30-7.40)                                        | 2.41 (2.16-2.70)                         | <0.001  | 1.96 (1.72-2.24)                           | 0.67 (0.07)                 | <0.001  | 98.7                 |
| Lactate (mmol/L) <sup>a</sup>        | 59.3 (2581)     | 1.8 (1.2-2.9)                                           | 2.28 (2.06-2.52)                         | <0.001  | 1.40 (1.22-1.62)                           | 0.34 (0.07)                 | <0.001  | 22.0                 |
| eGFR (mL/min/1.73m <sup>2</sup> )    | 99.7 (4340)     | 60.5 (36.1-84.3)                                        | 1.95 (1.77-2.15)                         | <0.001  | 1.26 (1.10-1.45)                           | 0.23 (0.07)                 | 0.001   | 10.7                 |
| Platelets (K/uL) <sup>a</sup>        | 99.5 (4331)     | 203 (155-260)                                           | 1.34 (1.24-1.44)                         | <0.001  | 1.18 (1.05-1.32)                           | 0.16 (0.06)                 | 0.006   | 7.6                  |
| Hemoglobin (mg/dL)                   | 99.3 (4321)     | 11.9 (9.9-13.6)                                         | 2.00 (1.65-2.42)                         | <0.001  | 1.40 (1.06-1.85)                           | 0.34 (0.14)                 | 0.018   | 5.6                  |
| Total bilirubin (mg/dL) <sup>a</sup> | 85.5 (3721)     | 0.7 (0.4-1.1)                                           | 1.34 (1.23-1.46)                         | <0.001  | 1.12 (0.98-1.28)                           | 0.12 (0.07)                 | 0.083   | 3.0                  |
| Blood glucose (mg/dL) <sup>a</sup>   | 98.7 (4297)     | 130 (105-176)                                           | 1.44 (1.33-1.56)                         | <0.001  | 1.07 (0.95-1.22)                           | 0.07 (0.06)                 | 0.265   | 1.2                  |
| AST (U/L) <sup>a</sup>               | 85.8 (3734)     | 34 (22-77)                                              | 1.80 (1.66-1.94)                         | <0.001  | 1.13 (0.89-1.43)                           | 0.12 (0.12)                 | 0.329   | 1.0                  |
| ALT (U/L) <sup>a</sup>               | 85.7 (3729)     | 27 (17-53)                                              | 1.70 (1.57-1.84)                         | <0.001  | 0.96 (0.76-1.20)                           | -0.05 (0.12)                | 0.699   | 0.1                  |

Abbreviations: ALT, alanine aminotransferase; AST, aspartate aminotransferase; eGFR, estimated glomerular filtration rate; SE, standard error.

<sup>a</sup> denotes variables which were log-transformed.

**Table S2:** Multivariable Analysis of In-hospital Mortality by Categorical Baseline Lab Indicators in the Derivation Cohort

| Lab Indicator                          | In-Hospital Mortality %, (n) | Adjusted Odds Ratio (95% CI) | p-value |
|----------------------------------------|------------------------------|------------------------------|---------|
| <b>Hemoglobin (mg/dL)</b>              |                              |                              |         |
| >12                                    | 9.9 (204)                    | Reference                    |         |
| 9-12                                   | 14.1 (231)                   | 1.19 (0.88-1.60)             | 0.26    |
| 7-<9                                   | 24.8 (137)                   | 1.70 (1.18-2.45)             | <0.01   |
| <7                                     | 26.0 (20)                    | 1.44 (0.68-3.04)             | 0.35    |
| <b>eGFR (mL/min/1.73m<sup>2</sup>)</b> |                              |                              |         |
| ≥45                                    | 8.61 (247)                   | Reference                    |         |
| <45                                    | 23.5 (346)                   | 1.82 (1.40-2.37)             | <0.01   |
| <b>Lactate (mmol/L)</b>                |                              |                              |         |
| <2                                     | 11.4 (166)                   | Reference                    |         |
| 2-4                                    | 21.2 (148)                   | 1.52 (1.11-2.08)             | 0.01    |
| >4-10                                  | 43.2 (144)                   | 2.17 (1.48-3.17)             | <0.01   |
| >10                                    | 69.8 (67)                    | 2.51 (1.30-4.85)             | 0.01    |
| <b>ALT (U/L)</b>                       |                              |                              |         |
| <ULN                                   | 10.5 (284)                   | Reference                    |         |
| 1-<3 x ULN                             | 20.0 (126)                   | 1.40 (0.96-2.04)             | 0.08    |
| 3-<5 x ULN                             | 23.0 (26)                    | 0.70 (0.33-1.47)             | 0.34    |
| 5-<10 x ULN                            | 49.0 (49)                    | 1.32 (0.59-2.96)             | 0.50    |
| >10 x ULN                              | 41.6 (69)                    | 0.77 (0.33-1.82)             | 0.55    |
| <b>AST (U/L)</b>                       |                              |                              |         |
| <ULN                                   | 9.5 (226)                    | Reference                    |         |
| 1-<3 x ULN                             | 18.2 (147)                   | 1.48 (1.04-2.09)             | 0.02    |
| 3-<5 x ULN                             | 21.0 (37)                    | 1.08 (0.58-2.01)             | 0.81    |
| 5-<10 x ULN                            | 35.8 (54)                    | 1.81 (0.90-3.65)             | 0.10    |
| >10 x ULN                              | 43.2 (92)                    | 1.66 (0.74-3.77)             | 0.22    |
| <b>Total bilirubin (mg/dL)</b>         |                              |                              |         |
| ≤1.2                                   | 13.1 (392)                   | Reference                    |         |
| >1.2-4                                 | 22.5 (147)                   | 1.25 (0.91-1.72)             | 0.18    |
| >4-10                                  | 28.1 (16)                    | 0.49 (0.20-1.23)             | 0.13    |
| >10                                    | 25.0 (3)                     | 0.99 (0.19-5.21)             | 0.99    |
| <b>Platelets (K/uL)</b>                |                              |                              |         |
| >200                                   | 11.3 (251)                   | Reference                    |         |
| >100-200                               | 14.2 (255)                   | 1.28 (0.97-1.68)             | 0.08    |
| 50-100                                 | 25.3 (59)                    | 1.42 (0.86-2.36)             | 0.17    |
| <50                                    | 41.4 (29)                    | 4.41 (2.02-9.63)             | <0.01   |

Abbreviations: ALT, alanine aminotransferase; eGFR, estimated glomerular filtration rate; AST, aspartate aminotransferase; ULN, upper limit of normal.

**Table S2:** Multivariable Analysis of In-hospital Mortality by Categorical Baseline Lab Indicators in the Derivation Cohort (continued)

| <b>Lab Indicator (continued)</b> | <b>In-Hospital Mortality %, (n) (continued)</b> | <b>Adjusted Odds Ratio (95% CI) (continued)</b> | <b>p-value (continued)</b> |
|----------------------------------|-------------------------------------------------|-------------------------------------------------|----------------------------|
| <b>Blood glucose (mg/dL)</b>     |                                                 |                                                 |                            |
| <80                              | 15.3 (21)                                       | Reference                                       |                            |
| 80-180                           | 10.8 (340)                                      | 1.43 (0.68-3.02)                                | 0.35                       |
| >180-300                         | 20.2 (153)                                      | 1.46 (0.67-3.18)                                | 0.34                       |
| >300                             | 27.6 (74)                                       | 1.81 (0.78-4.21)                                | 0.17                       |
| <b>pH (lowest)</b>               |                                                 |                                                 |                            |
| >7.30                            | 14.4 (211)                                      | Reference                                       |                            |
| >7.20-7.30                       | 25.8 (106)                                      | 1.64 (1.19-2.25)                                | <0.01                      |
| 7.00-7.20                        | 61.2 (148)                                      | 5.60 (3.94-7.98)                                | <0.01                      |
| <7.00                            | 76.8 (43)                                       | 11.21 (5.18-24.26)                              | <0.01                      |

**Table S3:** Baseline Characteristics of the CCCTN Validation Cohort (Second Campaign)

| <b>Characteristic</b>                            | <b>Overall, % (n)</b><br><b>(n=3888)</b> | <b>Alive at Discharge</b><br><b>(n=3368)</b> | <b>Death in Hospital</b><br><b>(n=520)</b> |
|--------------------------------------------------|------------------------------------------|----------------------------------------------|--------------------------------------------|
| <b>Demographics</b>                              |                                          |                                              |                                            |
| Age, median (IQR), y                             | 66 (56, 76)                              | 66 (55, 75)                                  | 69 (59, 78)                                |
| BMI, median (IQR), kg/m <sup>2</sup> (n=3845)    | 28.1 (24.3, 32.8)                        | 28.1 (24.3, 32.8)                            | 28.0 (24.1, 33.5)                          |
| Female                                           | 37.4 (1455)                              | 37.0 (1246)                                  | 40.2 (209)                                 |
| Caucasian (n=3312)                               | 70.5 (2335)                              | 69.5 (1985)                                  | 76.9 (350)                                 |
| <b>General Medical Problems and Risk Factors</b> |                                          |                                              |                                            |
| Smoking Status (n=3824)                          |                                          |                                              |                                            |
| Current                                          | 16.7 (637)                               | 17.1 (568)                                   | 13.5 (69)                                  |
| Ex-smoker                                        | 35.9 (1374)                              | 35.8 (1187)                                  | 36.5 (187)                                 |
| Unknown                                          | 10.5 (402)                               | 9.3 (307)                                    | 18.6 (95)                                  |
| Hypertension                                     | 66.9 (2600)                              | 67.0 (2256)                                  | 66.2 (344)                                 |
| Diabetes mellitus                                | 35.8 (1392)                              | 35.4 (1191)                                  | 38.7 (201)                                 |
| Chronic kidney disease                           | 27.3 (1061)                              | 26.3 (887)                                   | 33.5 (174)                                 |
| Dialysis dependent (n=1058)                      | 23.3 (247)                               | 22.3 (197)                                   | 28.9 (50)                                  |
| Significant pulmonary disease                    | 17.9 (697)                               | 16.6 (560)                                   | 26.3 (137)                                 |
| Significant liver disease                        | 3.3 (130)                                | 2.9 (99)                                     | 6.0 (31)                                   |
| <b>Cardiovascular History</b>                    |                                          |                                              |                                            |
| Coronary artery disease                          | 38.2 (1484)                              | 37.9 (1277)                                  | 39.8 (207)                                 |
| Cerebrovascular disease                          | 10.4 (405)                               | 9.9 (335)                                    | 13.5 (70)                                  |
| Peripheral artery disease                        | 10.4 (403)                               | 10.6 (356)                                   | 9.0 (47)                                   |
| Heart failure                                    | 40.7 (1582)                              | 39.8 (1339)                                  | 46.7 (243)                                 |
| LVEF < 40% (n=1544)                              | 63.1 (974)                               | 63.2 (826)                                   | 62.4 (148)                                 |
| Atrial fibrillation                              | 28.0 (1088)                              | 27.2 (917)                                   | 32.9 (171)                                 |
| Ventricular arrhythmia                           | 7.2 (278)                                | 7.2 (244)                                    | 6.5 (34)                                   |
| Severe valvular disease                          | 17.2 (668)                               | 16.8 (566)                                   | 19.6 (102)                                 |
| Pulmonary hypertension                           | 6.3 (243)                                | 6.1 (204)                                    | 7.5 (39)                                   |
| Congenital heart disease                         | 1.8 (70)                                 | 1.8 (59)                                     | 2.1 (11)                                   |

All data are reported as column % (n), unless otherwise specified.

For rows with missing baseline characteristics data, available n is specified.

Abbreviations: BMI, body mass index; CCCTN, Critical Care Cardiology Trials Network; IQR, interquartile range; LVEF, left ventricular ejection fraction



**Table S4:** Comparative Performance of the CCCTN Lab-based Risk Score

|                                                 | <b>Harrell's C-index (95% CI)</b> |
|-------------------------------------------------|-----------------------------------|
| <b>CCCTN Campaign 1 (Derivation Cohort)</b>     |                                   |
| Lab-Based Risk Score                            | 0.82 (0.80-0.84)                  |
| SOFA Score                                      | 0.85 (0.83-0.87)                  |
| <b>CCCTN Campaign 2 (Validation Cohort)</b>     |                                   |
| Lab-Based Risk Score                            | 0.82 (0.80-0.84)                  |
| SOFA Score                                      | 0.85 (0.83-0.87)                  |
| <b>CCCTN Campaign 3</b>                         |                                   |
| Lab-Based Risk Score (pH = initial pH)          | 0.79 (0.77-0.81)                  |
| Lab-Based Risk Score (pH = worst pH)            | 0.83 (0.81-0.85)                  |
| SOFA Score                                      | 0.85 (0.83-0.87)                  |
| <b>Mayo Cohort (External Validation Cohort)</b> |                                   |
| Lab-Based Risk Score (pH = initial pH)          | 0.79 (0.77-0.80)                  |
| SOFA Score                                      | 0.84 (0.82-0.85)                  |

Abbreviations: CI, confidence interval; CCCTN, Critical Care Cardiology Trials Network; SOFA, Sequential Organ Failure Assessment

**Figure S1:** Univariable Analysis Splines of In-hospital Mortality by Lab Indicator

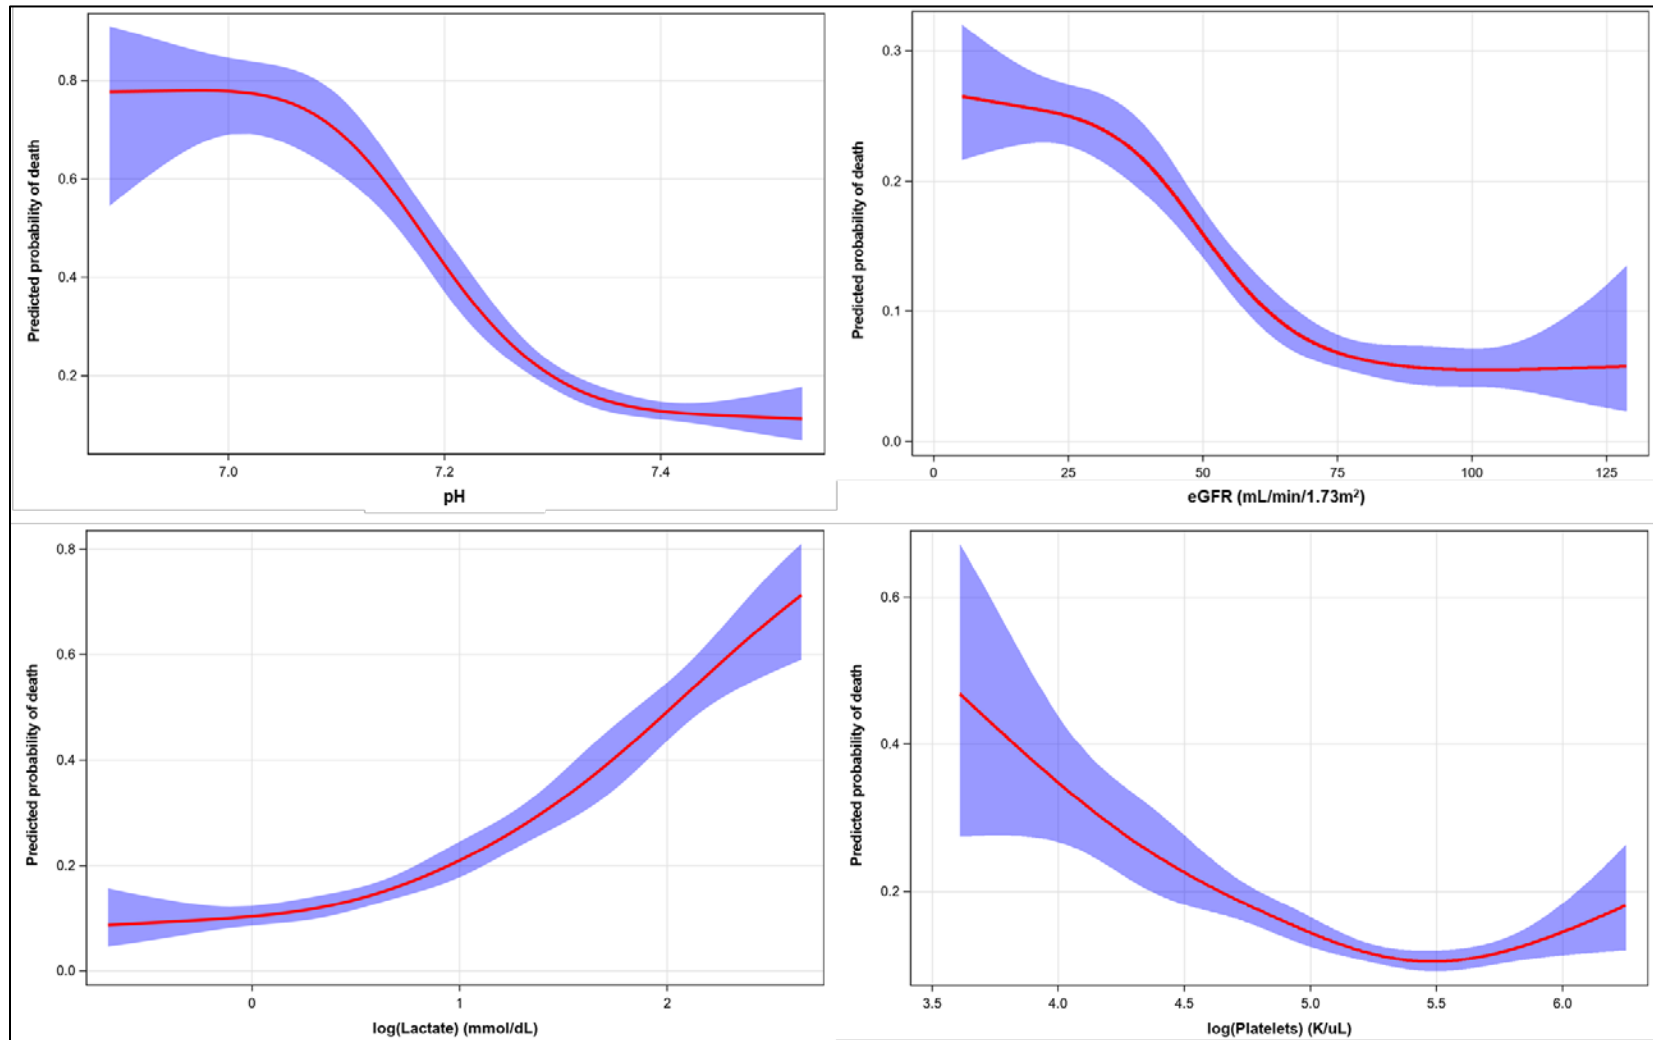

Abbreviations: eGFR, estimated glomerular filtration rate

**Figure S2:** In-Hospital Mortality by CCCTN Lab-Based Risk Score in ACS and HF in the Derivation Coho

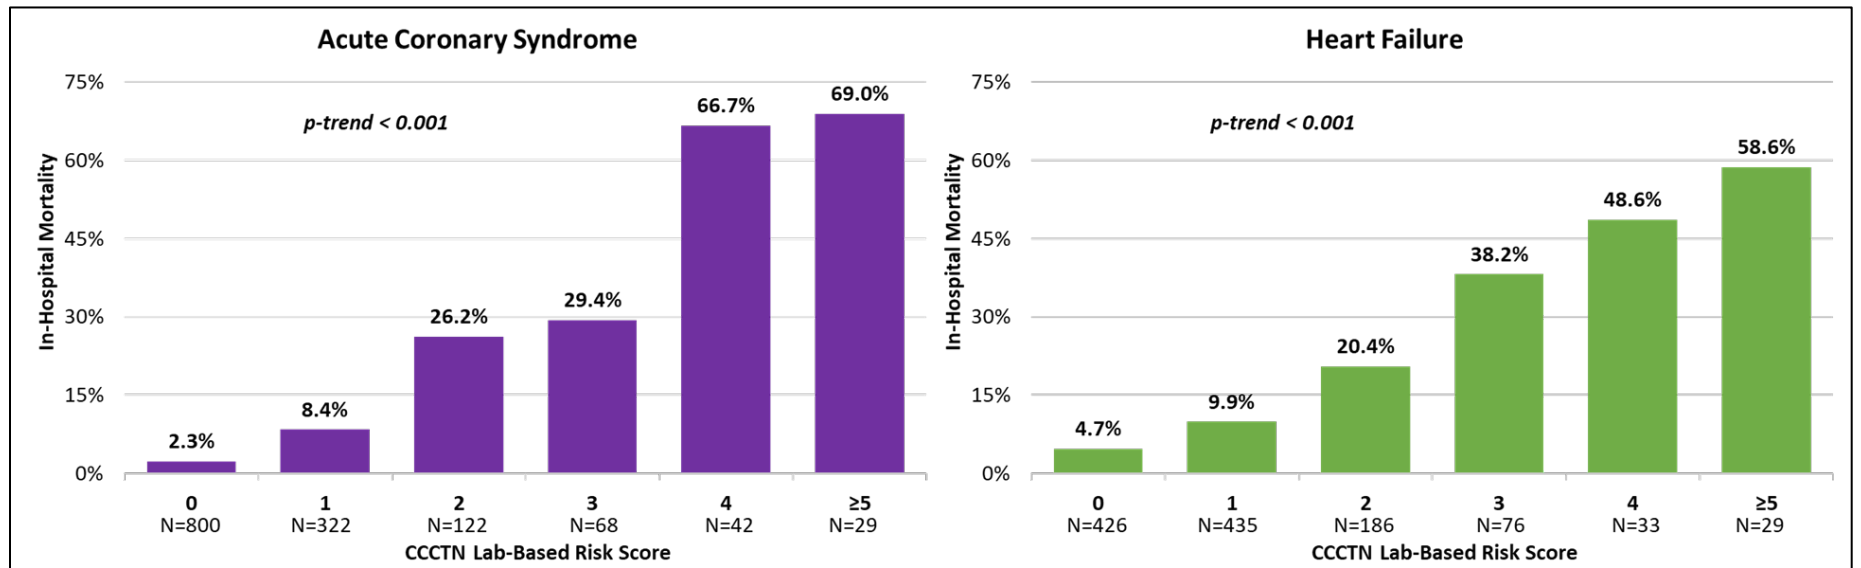

Abbreviations: CCCTN, Critical Care Cardiology Trials Network

**Figure S3:** Calibration Across Subgroups (Derivation Cohort) of the CCCTN Lab-Based Risk Score

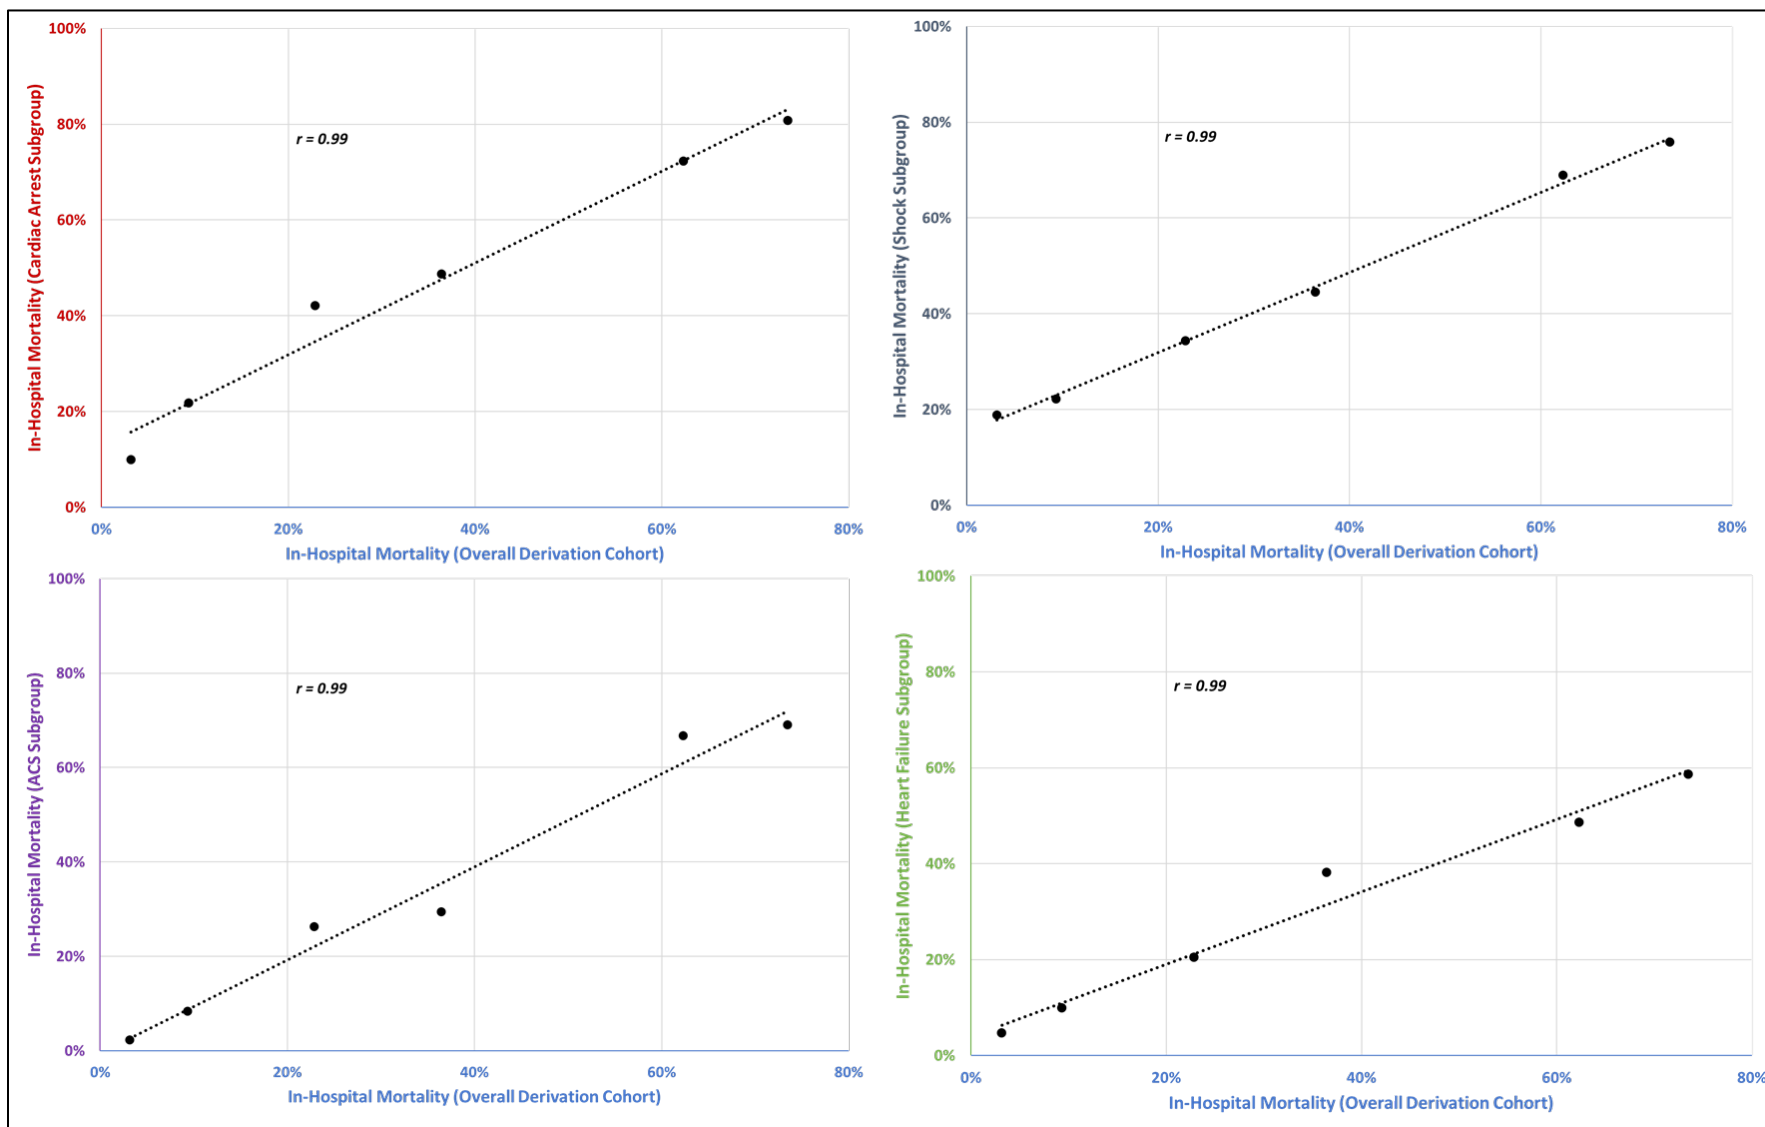

Abbreviations: ACS, acute coronary syndrome; CCCTN, Critical Care Cardiology Trials Network.

**Figure S4:** Discriminatory Performance of the CCCTN Lab-Based Risk Score in the Derivation Cohort and the CCCTN Validation Cohorts

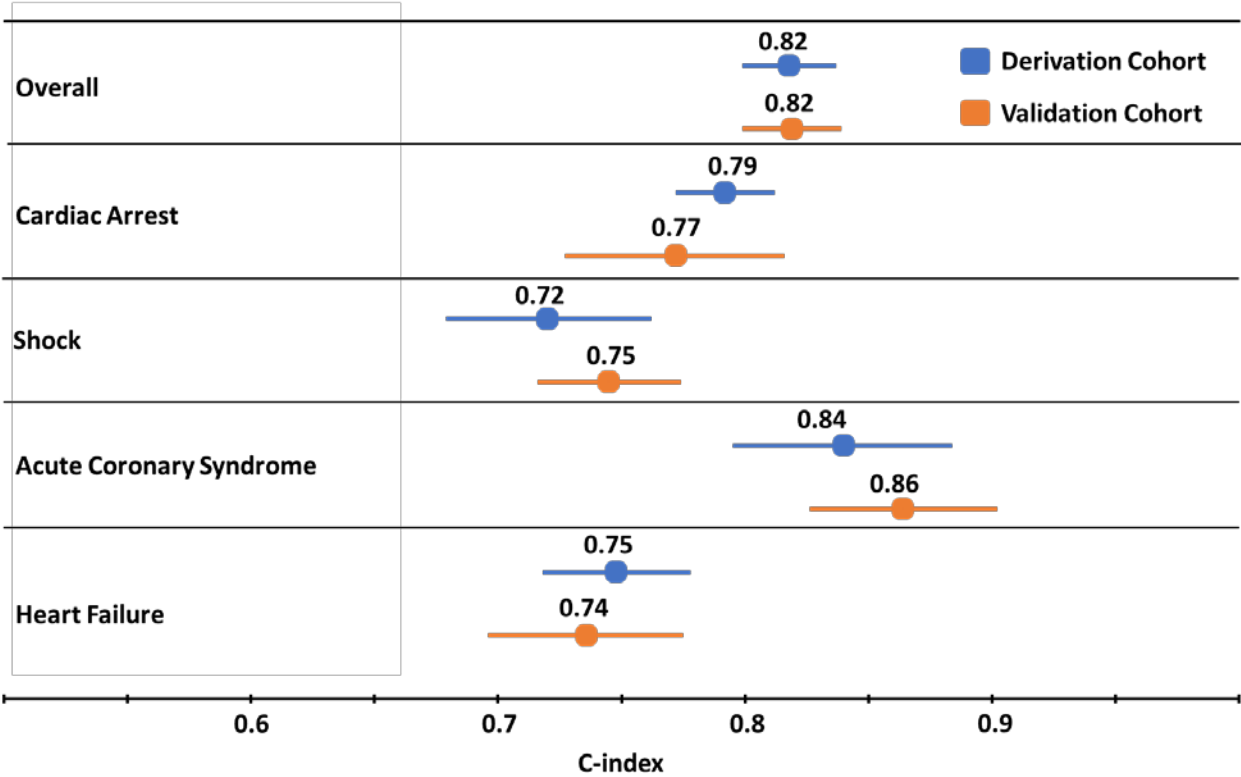

Abbreviations: CCCTN, Critical Care Cardiology Trials Network

**Figure S5:** In-Hospital Mortality by CCCTN Lab-Based Risk Score in the Third Collection Campaign using Initial and Worst pH

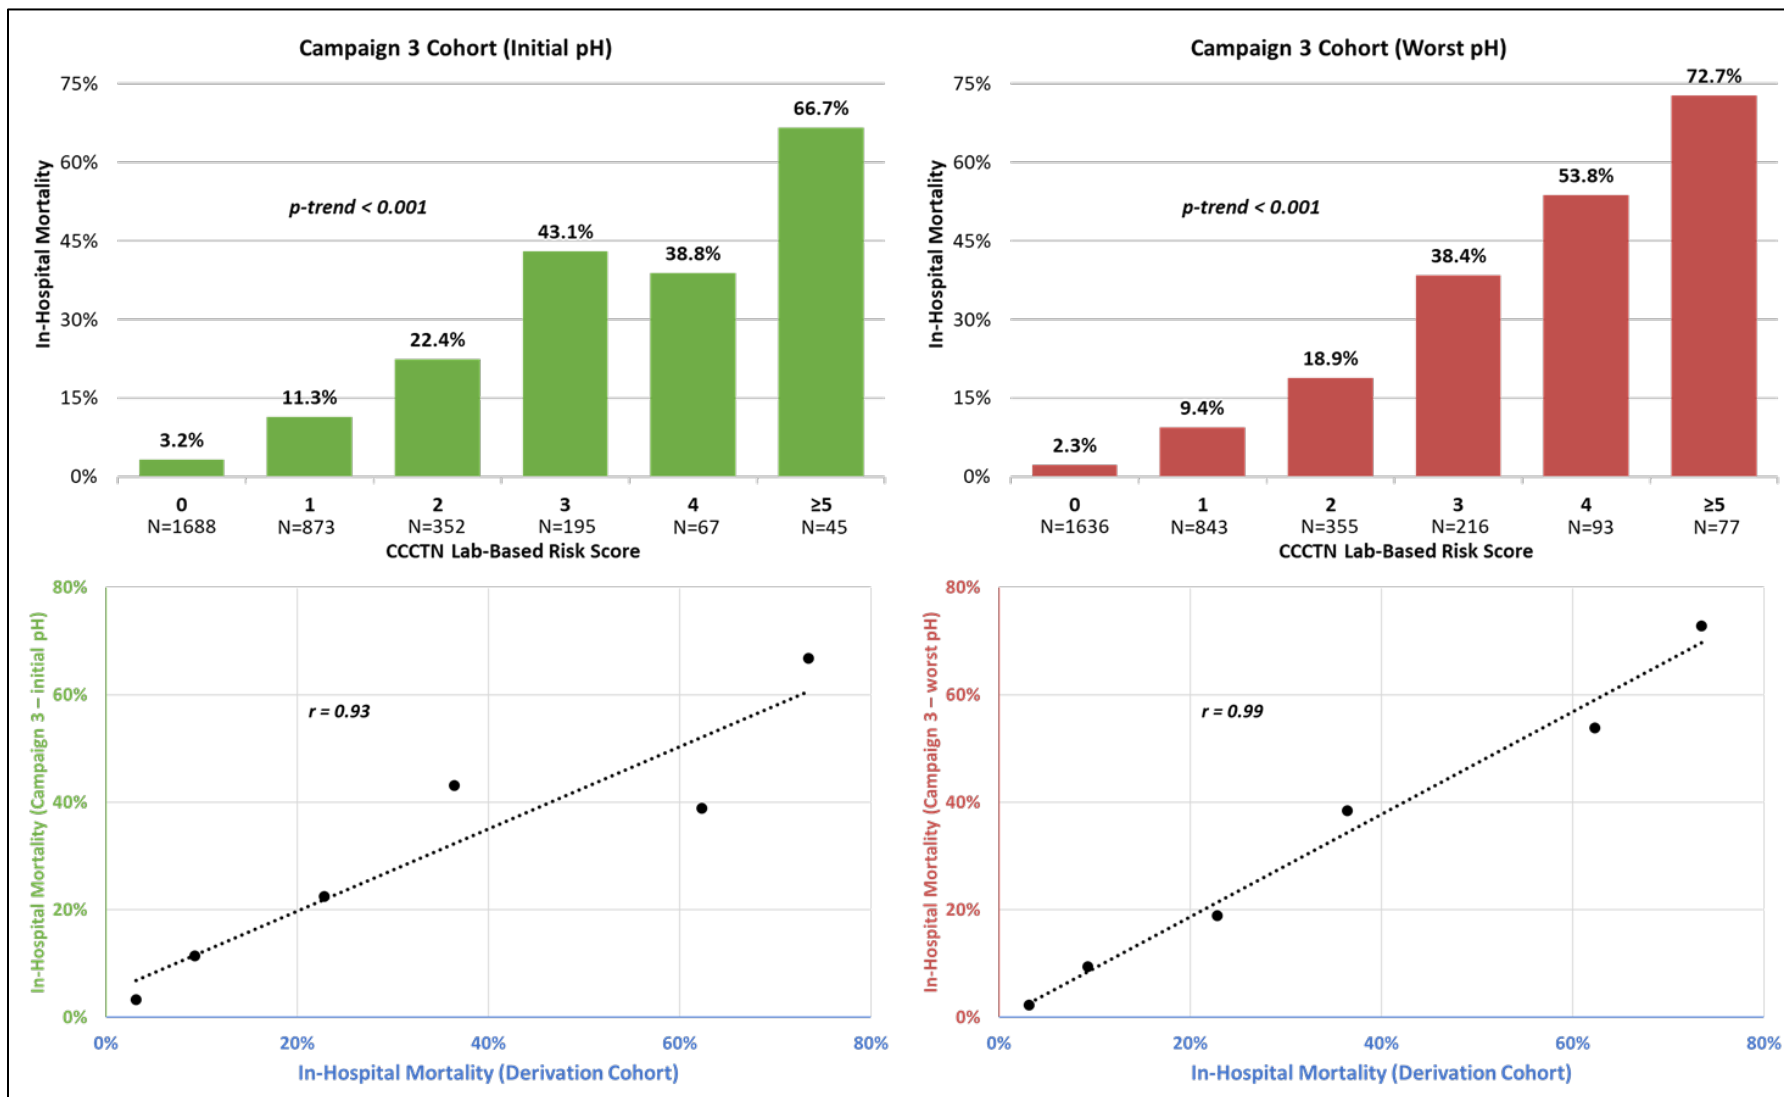

Abbreviations: CCCTN, Critical Care Cardiology Trials Network
